# Supplementary material for: Optical tweezers-based characterisation of gold core–satellite plasmonic nano-assemblies incorporating thermo-responsive polymers
Source: Royal Society of Chemistry journal article supplement (doi:10.1039/c9nr07891f), 2019-12-17
Supplement: c9nr07891f1.pdf [file c9nr07891f1.pdf]

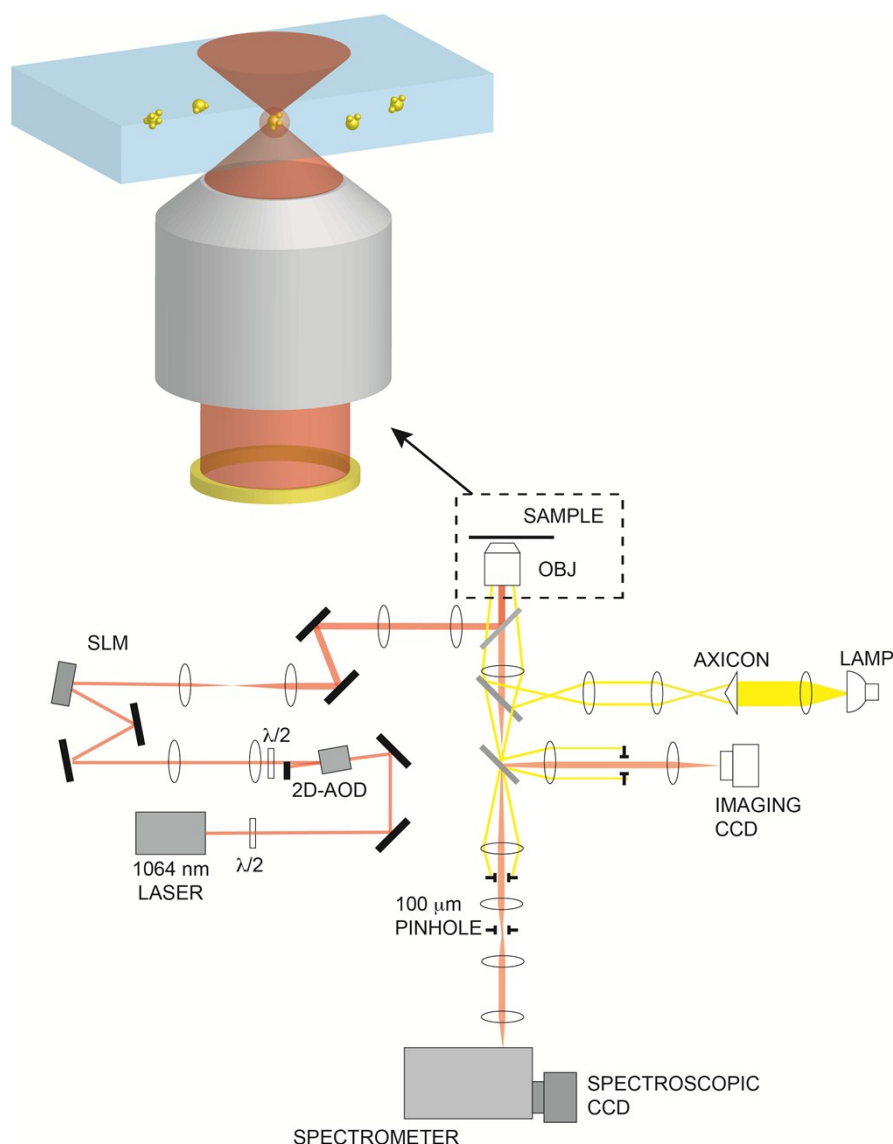

Figure S1. Schematic diagram of the optical tweezers combined with dark-field imaging and spectroscopy. Trapping is achieved using an infrared emitting solid state laser that is focused through a high-numerical aperture objects into a fluid filled chamber containing the nanoparticles. The heating in the trap is controlled by the strength of the trapping laser. Dark field imaging is achieved by illuminating back aperture of the objective with a ring illumination and then collecting only the scattered light through a confocal aperture; the scattered light is passed to a spectrometer to record the spectrum of the trapped object.

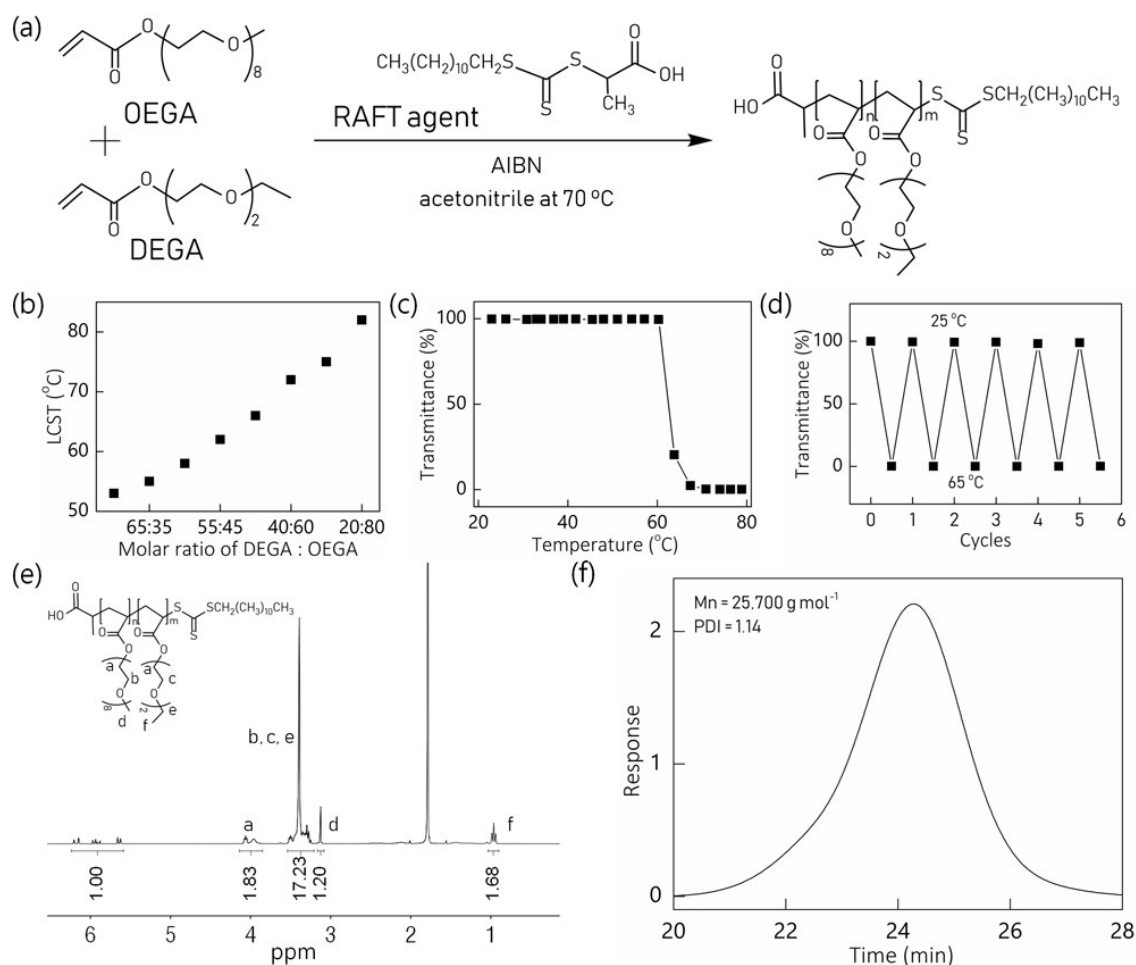

Figure S2. Thermoresponsive copolymer synthesis and characterization. (a) Schematic presentation of poly(DEGA-co-OEGA) synthesis *via* RAFT polymerization. (b) The LCST measurement of poly(DEGA-co-OEGA) at a different molar ratio of DEGA:OEGA (The data was shown in Table S1). (c) Thermal Profile (2 °C/min) of poly(DEGA-co-OEGA) (entry 9,  $M_w = 25,700 \text{ g/mol}$ , [DEGA]:[OEGA] = 60:40) in Milli-Q water as measured by UV-Vis measurement ( $\lambda = 500 \text{ nm}$ , [copolymer] = 5.0 mg/mL). The LCST of copolymer is around 60 °C. (d) Thermal cycling of poly(DEGA-co-OEGA) (entry 9) after 6 cycles of heating and cooling. (e) NMR data of poly(DEGA-co-OEGA) (entry 9). The  $^1\text{H}$ NMR spectra and peak labels for (top panel) before purification (f) GPC data of poly(DEGA-co-OEGA) (entry 9).

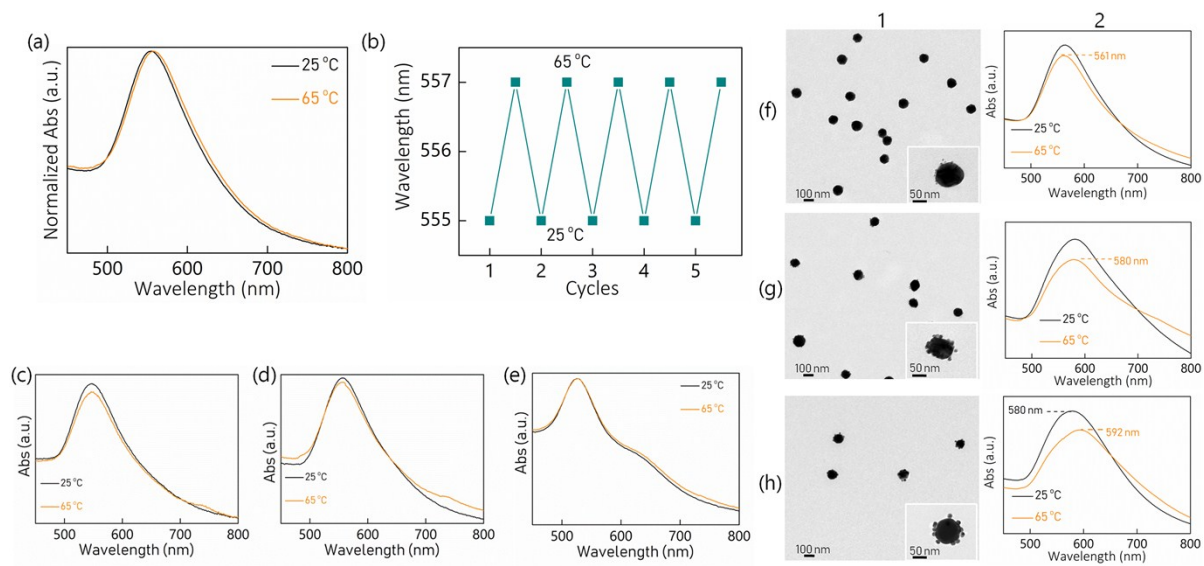

Figure S3. (a)-(b) Representative UV-Vis characterizing the thermal behaviour of the AuNP<sub>80 nm</sub>@poly(DEGA-co-OEGA) and thermal cycling of the AuNP<sub>80 nm</sub>@poly(DEGA-co-OEGA). (c)-(e) The effect of different amount of MPTMS: (c) 0.5  $\mu$ L, 1% MPTMS, (d) 1  $\mu$ L, 1% MPTMS and (e) 3  $\mu$ L, 1% MPTMS ethanol solution on the responsive behaviour of the core<sub>80 nm</sub>-satellite<sub>40 nm</sub>. (e)-(h) TEM images (Panel 1) and UV-Vis spectra (Panel 2) (e) for core<sub>80 nm</sub>-satellite<sub>10 nm</sub>; (f) core<sub>80 nm</sub>-satellite<sub>15 nm</sub>; (h) core<sub>80 nm</sub>-satellite<sub>20 nm</sub>.

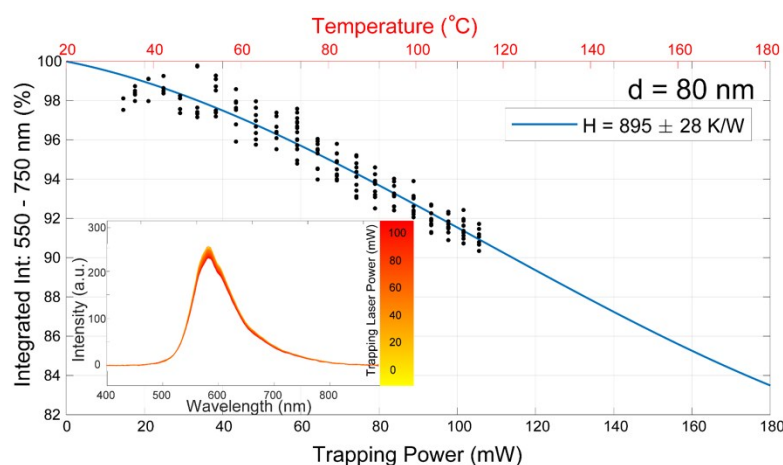

Figure S4. Backscattering spectra of 80 nm gold nanoparticles in the optical tweezers as the trapping power is cycled, 550 nm peak decreases in integrated intensity as the power is increased due to change in refractive index of surrounding water as it is heated. Change in integrated intensity vs trapping laser power is used to determine the temperature of the nanoparticles based on the temperature of the surrounding water. The measurements are used to give an indicative measure of the expected heating in the trap for the core-satellite nano-assemblies.

Table S1 Summary of copolymers used in this paper (Entry 9 was chosen as the copolymer to react with the AuNP).

| Entry | Feed Ratio (mol %) |      | Reaction hours (h) | Reaction temperature (°C) | $M_w$ (g/mol) | Temperature (LCST) (°C) |
|-------|--------------------|------|--------------------|---------------------------|---------------|-------------------------|
|       | DEGA               | OEGA |                    |                           |               |                         |
| 1     | 70                 | 30   | 2                  | 70                        | 20,000        | 53                      |
| 2     | 70                 | 30   | 3                  | 70                        | 25,000        | 54                      |
| 3     | 70                 | 30   | 4                  | 70                        | 24,500        | 54                      |
| 4     | 65                 | 35   | 2                  | 70                        | 10,000        | 55                      |
| 5     | 65                 | 35   | 3                  | 70                        | 22,000        | 56                      |
| 6     | 65                 | 35   | 4                  | 70                        | 20,500        | 56                      |
| 7     | 60                 | 40   | 2                  | 70                        | 10,000        | 58                      |
| 8     | 60                 | 40   | 3                  | 70                        | 22,400        | 58                      |
| 9     | 60                 | 40   | 4                  | 70                        | 25,700        | 58                      |
| 10    | 55                 | 45   | 2                  | 70                        | 10,000        | 62                      |
| 11    | 55                 | 45   | 3                  | 70                        | 17,100        | 62                      |
| 12    | 55                 | 45   | 4                  | 70                        | 28,180        | 62                      |
| 13    | 50                 | 50   | 2                  | 70                        | 12,100        | 66                      |
| 14    | 50                 | 50   | 3                  | 70                        | 15,218        | 65                      |
| 15    | 50                 | 50   | 4                  | 70                        | 24,857        | 66                      |
| 16    | 40                 | 60   | 2                  | 70                        | 15,121        | 72                      |
| 17    | 40                 | 60   | 3                  | 70                        | 24,578        | 72                      |
| 18    | 40                 | 60   | 4                  | 70                        | 26,173        | 73                      |
| 19    | 35                 | 65   | 2                  | 70                        | 25,821        | 75                      |
| 20    | 35                 | 65   | 3                  | 70                        | 20,125        | 75                      |
| 21    | 35                 | 65   | 4                  | 70                        | 29,466        | 75                      |
| 22    | 20                 | 80   | 2                  | 70                        | 18,080        | 82                      |
| 23    | 20                 | 80   | 3                  | 70                        | 24,198        | 83                      |
| 24    | 20                 | 80   | 4                  | 70                        | 26,917        | 82                      |
